# Supplementary material for: Enhanced pseudo-atomic layer deposition of antimony telluride thin films by co-injecting NH3 gas with both precursors
Source: Royal Society of Chemistry journal article supplement (doi:10.1039/d3tc00007a), 2023-01-01
Supplement: d3tc00007a1.pdf [file d3tc00007a1.pdf]

Electronic Supplementary Material (ESI) for Journal of Materials Chemistry C.  
This journal is © The Royal Society of Chemistry 2023

# Supporting Information

## **Enhanced Pseudo-Atomic Layer Deposition of Antimony Telluride Thin Films by Co-injecting NH<sub>3</sub> Gas with Both Precursors**

*Sangmin Jeon, Jeong Woo Jeon, Wonho Choi, Byongwoo Park, Gwangsik Jeon, Chanyoung  
Yoo,\* and Cheol Seong Hwang\**

Department of Materials Science and Engineering and Inter-University Semiconductor  
Research Center, Seoul National University, Seoul, 08826, South Korea

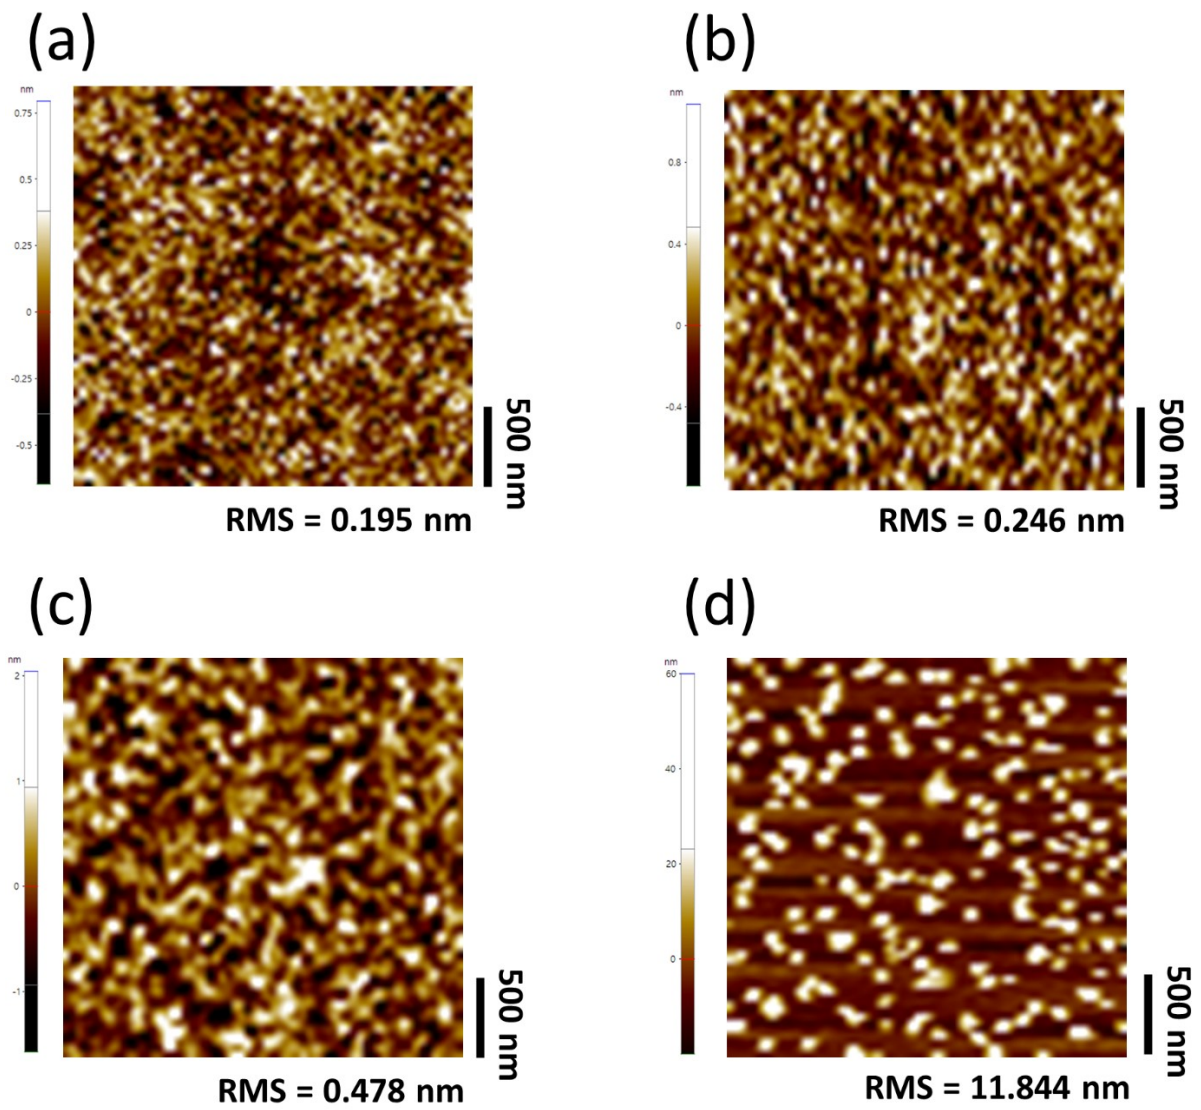

**Fig. S1** AFM images of films grown by the “Sb only” process on (a)  $\text{SiO}_2$  and (b) TiN substrate. AFM images of films grown by the “Te after Sb” process on (c)  $\text{SiO}_2$  and (d) TiN substrate.

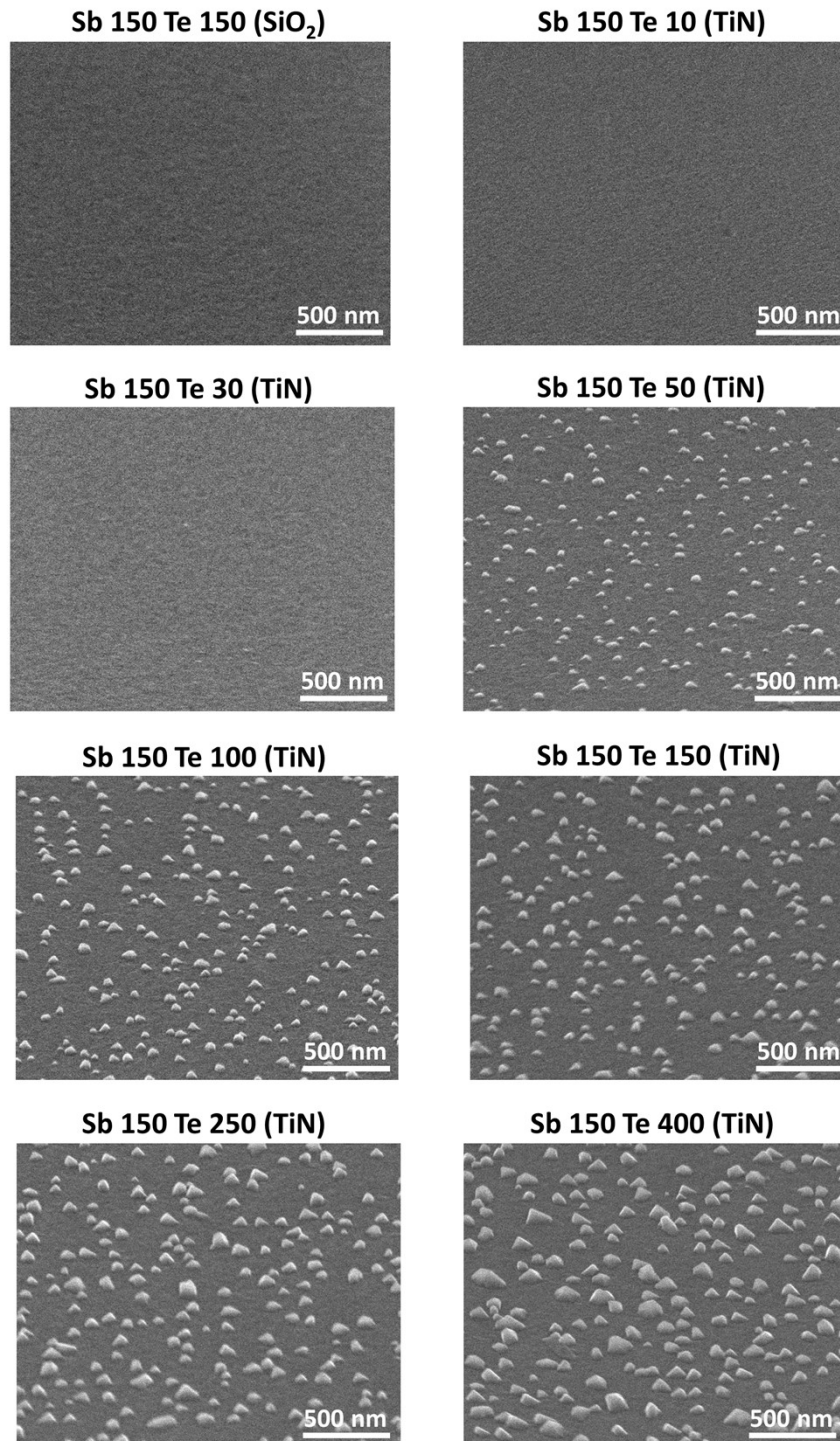

**Fig. S2 Bird's eye-view SEM images** ( $60^\circ$  tilted from surface-normal direction) of the films deposited by the "Te after Sb" process. The number of



“Te only” cycles was varied after a fixed 150 “Sb only” cycles.

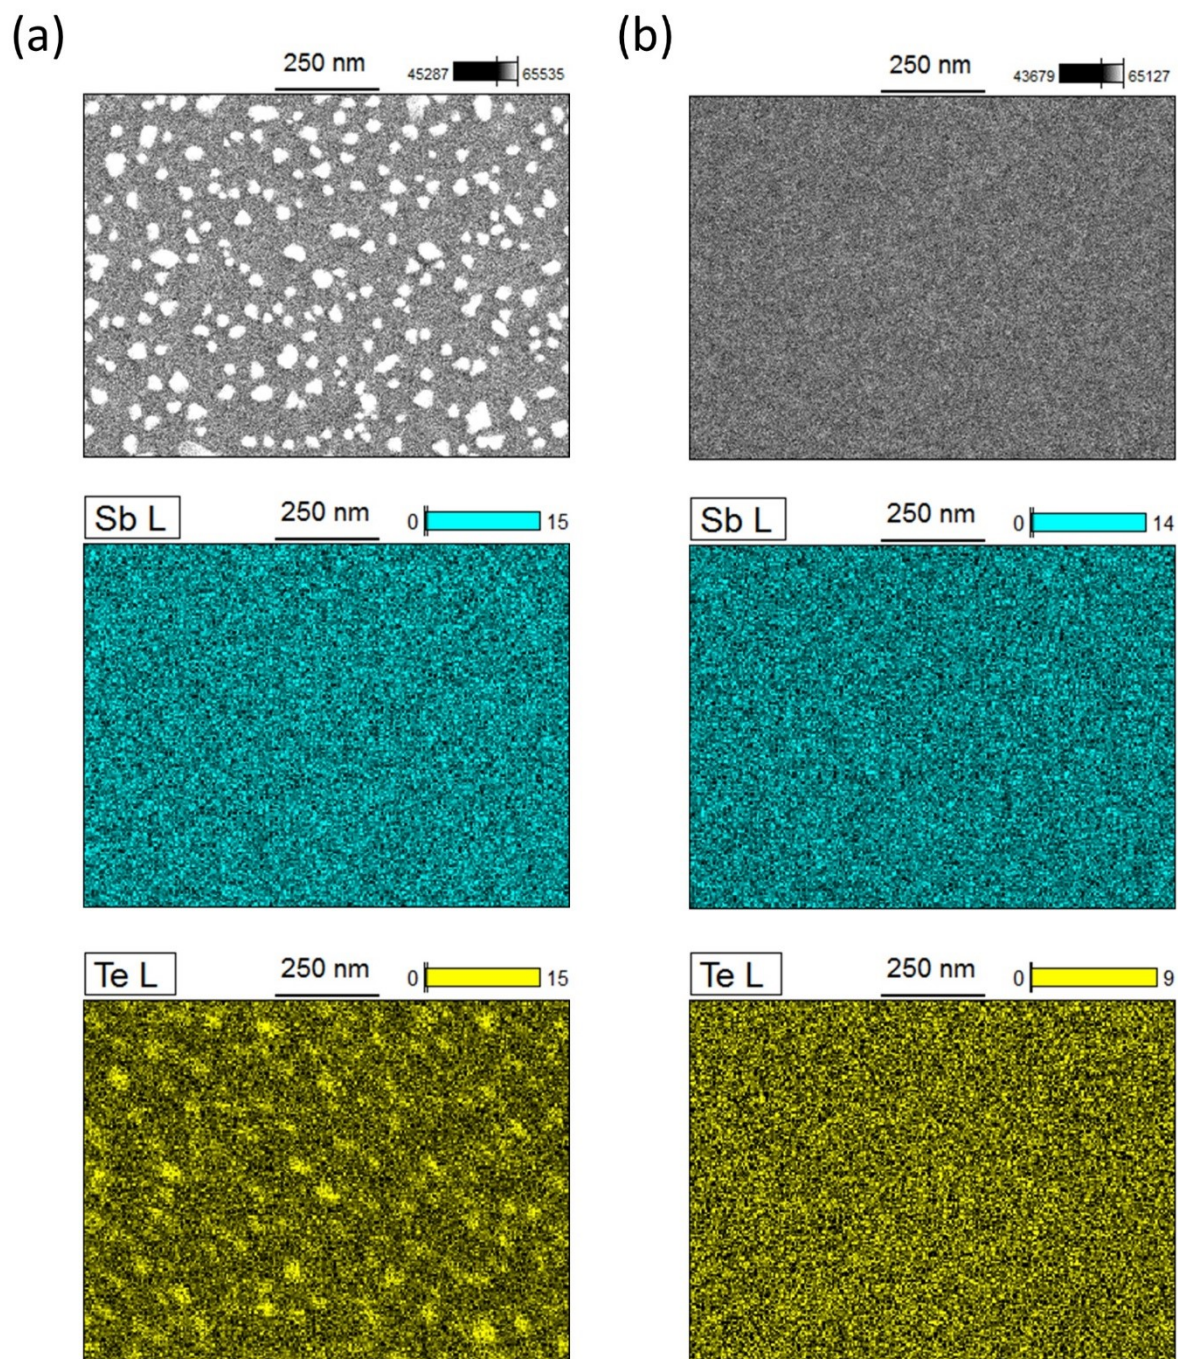

**Fig. S3** SEM-EDS images of films deposited by the “Te after Sb” process on (a)

TiN and (b) SiO<sub>2</sub> substrate.

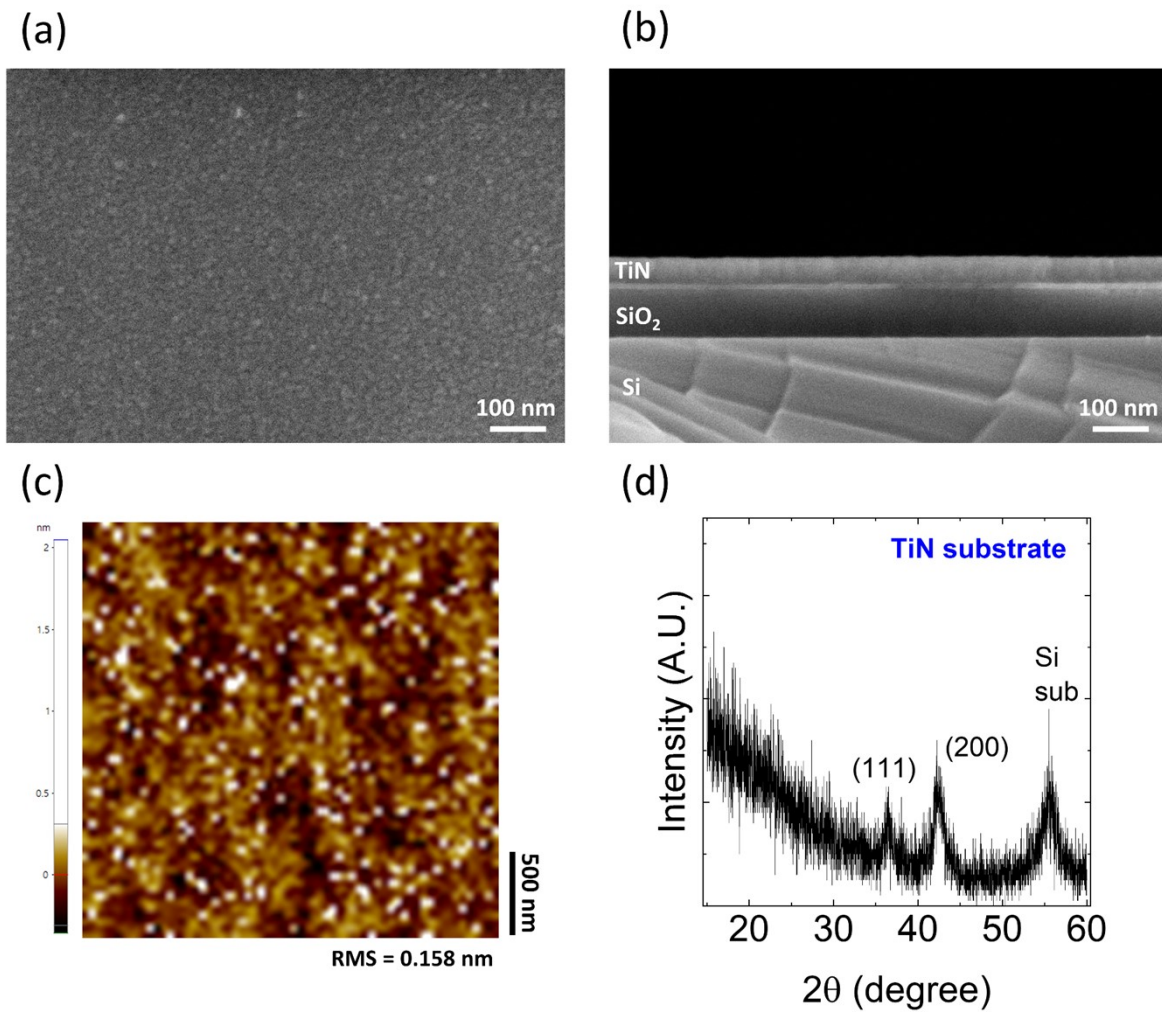

**Fig. S4** (a) Top-view SEM, (b) cross-sectional SEM, (c) AFM image, and (d) GAXRD pattern of the TiN substrate. The TiN substrate displayed the typical columnar grains in sputtered TiN<sup>1</sup> with a grain diameter of ~10 nm. The RMS roughness of the TiN substrates (0.158 nm) was higher than that of the SiO<sub>2</sub> substrate (0.081 nm). The GAXRD pattern indicates that the TiN substrate does

not possess a preferred orientation.

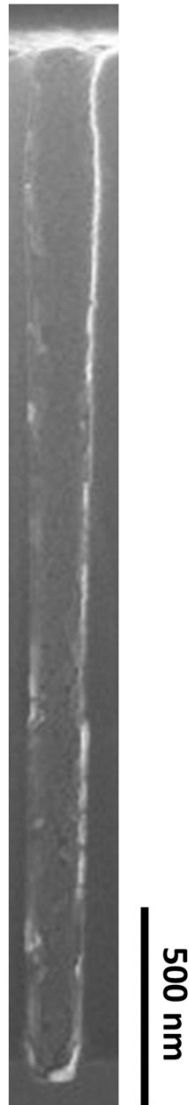

**Fig. S5** Cross-sectional SEM image of the Sb<sub>2</sub>Te<sub>3</sub> film deposited on a high-

aspect-ratio (29:1) hole structure.

## References

1. L. Zhang, H. Yang, X. Pang, K. Gao and A. A. Volinsky, *Surface and Coatings Technology*, 2013, **224**, 120-125.
